# Supplementary material for: Berberine Reverses Hypoxia-induced Chemoresistance in Breast Cancer through the Inhibition of AMPK- HIF-1α
Source: PubMed Central journal article supplement — Int J Biol Sci. 2017 Jun 1;13(6):794–803. doi: 10.7150/ijbs.18969 (PMC5485634; doi:10.7150/ijbs.18969), 2017-06-01
Supplement: ijbsv13p0794s1.pdf [file ijbsv13p0794s1.pdf]

### Supplementary file

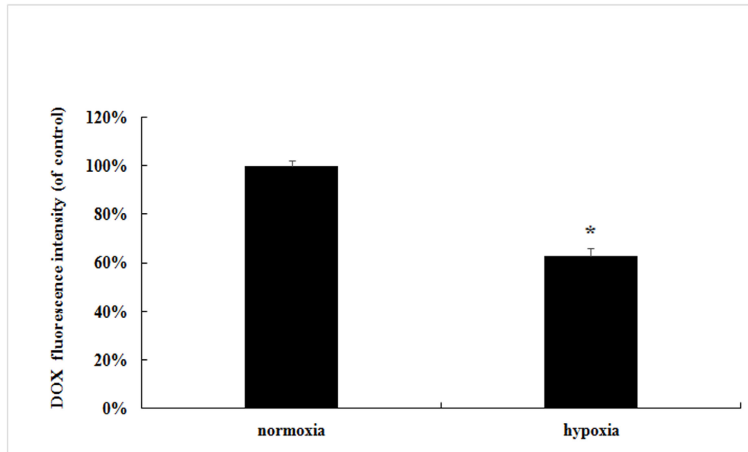

Fig. S1 The fluorescence intensity of DOX in MCF-7/normoxia and MCF-7/hypoxia. 1 \*  $P < 0.05$ , hypoxia vs. normoxia

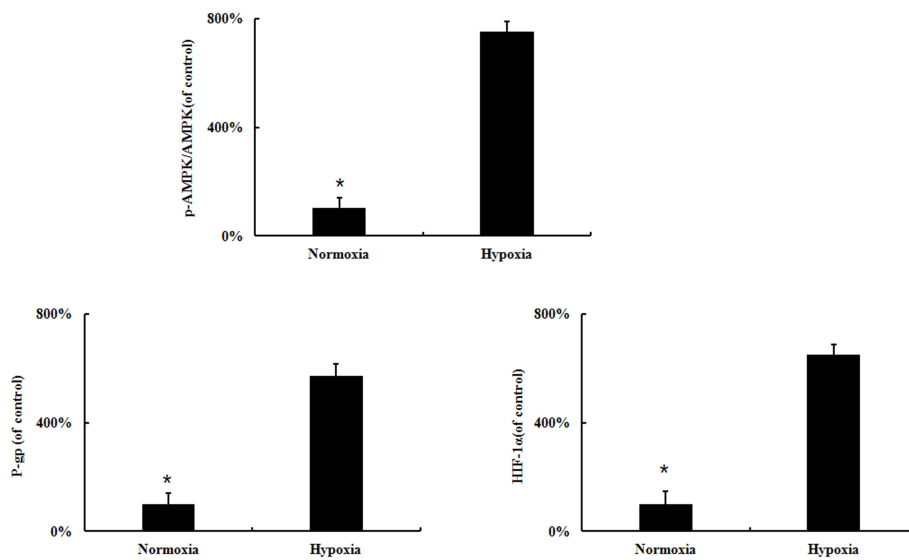

Fig. S2 The western blot quantitation in Fig.1B. \*  $P < 0.05$ , hypoxia vs. normoxia.

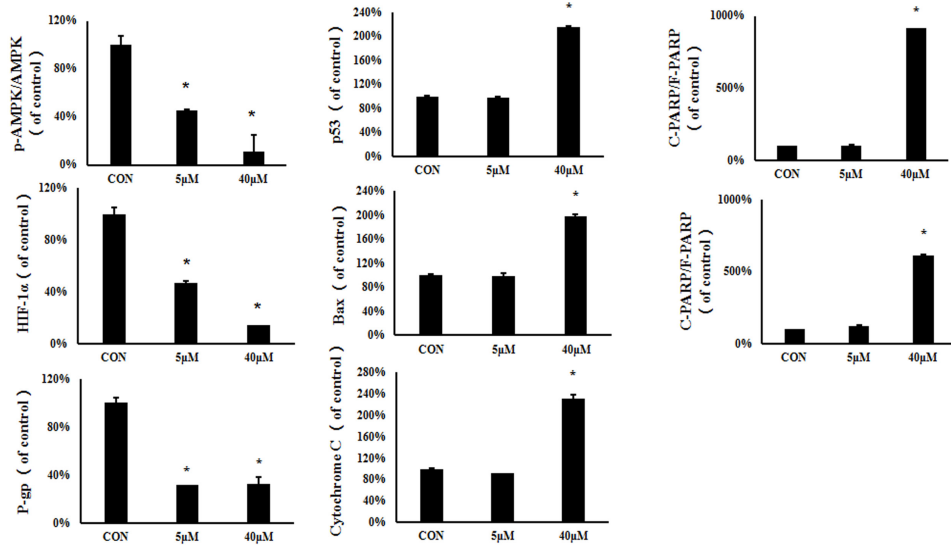

Fig. S3 The western blot quantitation in Fig.2C. \* P < 0.05, MCF-7/hypoxia treated with berberine vs. control group.

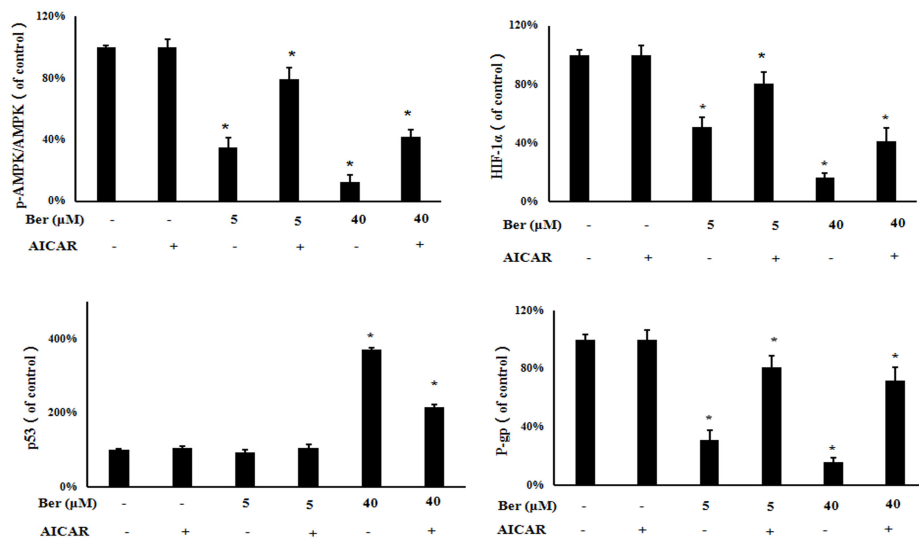

Fig. S4 The western blot quantitation in Fig.4C. \* P < 0.05, MCF-7/hypoxia treated with berberine and (or) AICAR groups vs. control group.

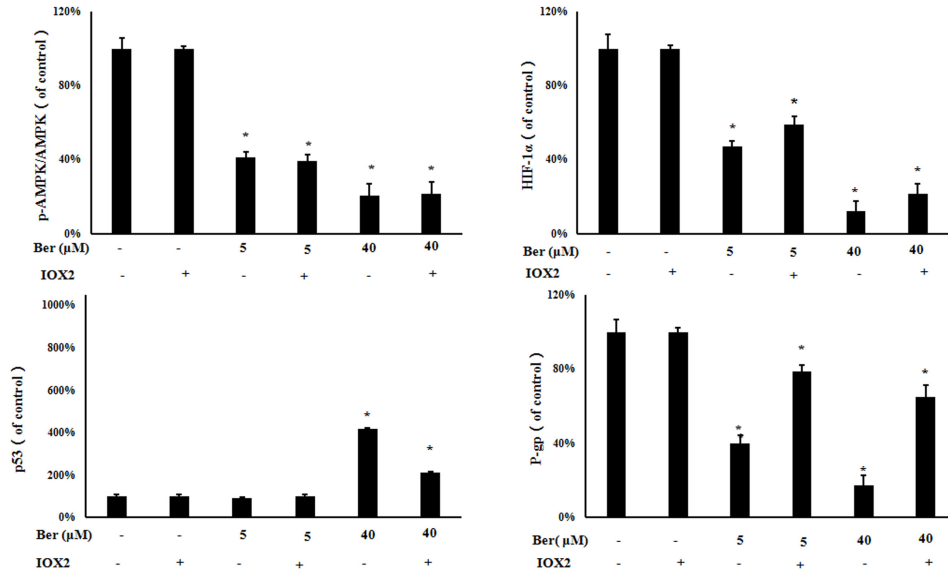

Fig. S5 The western blot quantitation in Fig.5C. \* P <0.05, MCF-7/hypoxia treated with berberine and (or) IOX2 groups vs. control group.

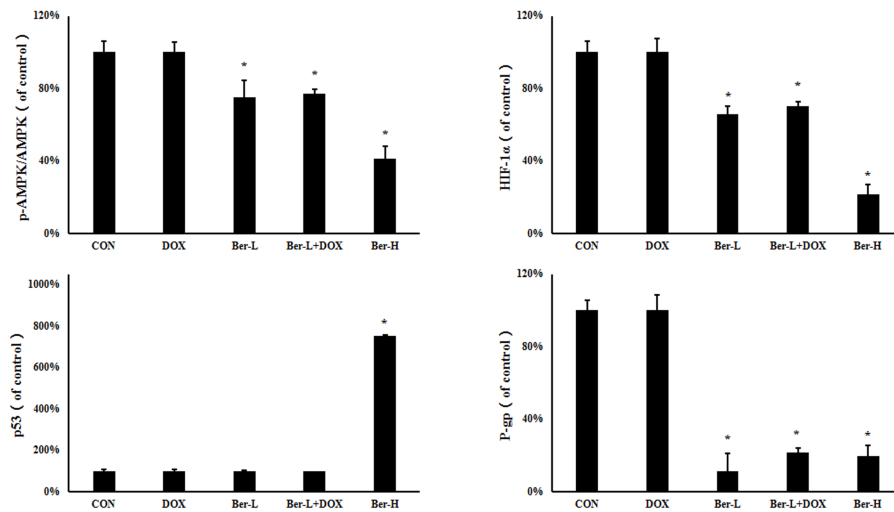

Fig. S6 The western blot quantitation in Fig.7. \* P <0.05, mice treated with berberine and (or) DOX groups vs. control group.
